**NOTICE OF WITHDRAWAL**

The authors of the article listed below would like to formally withdraw it from publication, since a more complete description of the case described has previously appeared in the journal *Masui*:

Terazawa E, Shimonaka H, Nagase K, Masue T, Dohi S: Severe anaphylactic reaction due to a chlorhexidine-impregnated central venous catheter. *ANESTHESIOLOGY* 1998; 89:1296-8

**AUTHOR CORRECTION**

A Clinical Investigation authored by Leighton *et al.* published in the April 1999 issue of *ANESTHESIOLOGY* (1999; 90:1039-46) contained an error.

In the last complete paragraph on page 1040, a dose of fentanyl was erroneously presented as 2 mg/ml. The dose should have been expressed as 2  $\mu\text{m}/\text{ml}$ .

**AUTHOR CORRECTION**

A Clinical Investigation authored by De Kock *et al.* published in the May 1999 issue of *ANESTHESIOLOGY* (1999; 90:1354-62) contained an error.

Throughout the manuscript, clonidine doses, which should have been expressed as  $\mu\text{g}/\text{kg}$  or as  $\mu\text{g} \cdot \text{kg}^{-1} \cdot \text{hr}^{-1}$ , were erroneously presented as  $\text{mg}/\text{kg}$  or  $\text{mg} \cdot \text{kg}^{-1} \cdot \text{hr}^{-1}$ . For example, in the Methods section of the abstract, the correct epidural dose of clonidine was 10  $\mu\text{g}/\text{kg}$  initially followed by an infusion of 6  $\mu\text{g} \cdot \text{kg}^{-1} \cdot \text{hr}^{-1}$ . Similar errors can be found in the Methods section (top of page 1355) and in the Discussion (pages 1356 and 1358).
